# Supplementary material for: Assessing the ligand selectivity of sphingosine kinases using molecular dynamics and MM-PBSA binding free energy calculations
Source: Royal Society of Chemistry journal article supplement (doi:10.1039/c6mb00067c), 2016-02-22
Supplement: c6mb00067c1.pdf [file c6mb00067c1.pdf]

## Supplementary data for

### **Assessing ligand selectivity of sphingosine kinases with molecular dynamics and MM-PBSA binding free energy calculations**

Liang Fang<sup>a,b</sup>, Xiaojian Wang<sup>a,b</sup>, Meiyang Xi<sup>a</sup>, Tianqi Liu<sup>b</sup> and Dali Yin<sup>a,b</sup>

<sup>a</sup>*State Key Laboratory of Bioactive Substances and Functions of Natural Medicines, Institute of Materia Medica, Peking Union Medical College, Chinese Academy of Medical Sciences,*

<sup>b</sup>*Department of Medicinal Chemistry, Beijing Key Laboratory of Active Substances Discovery and Drugability Evaluation, Institute of Materia Medica, Peking Union Medical College, Chinese Academy of Medical Sciences*

\*Corresponding author

Tel.: +86 10 63165248

Email: wangxiaojian@imm.ac.cn; yindali@imm.ac.cn

**Figure S1.**Line Plot of the residue score

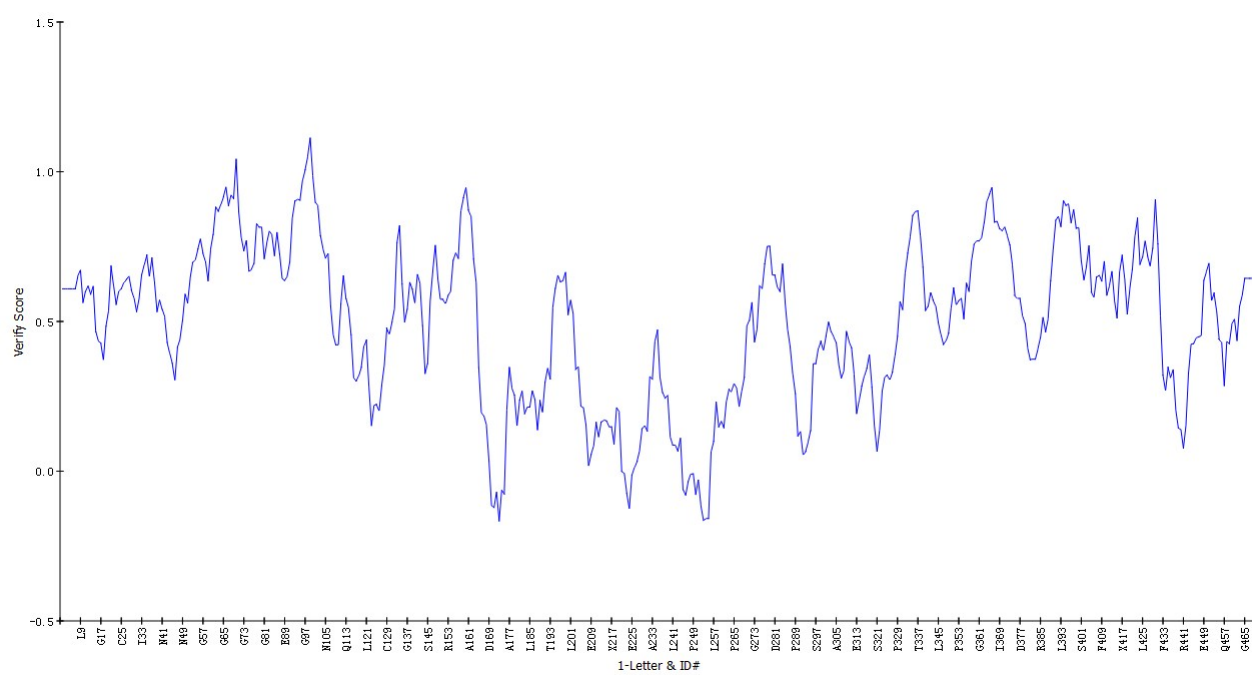

**Figure S2 RMSDs of additional study**

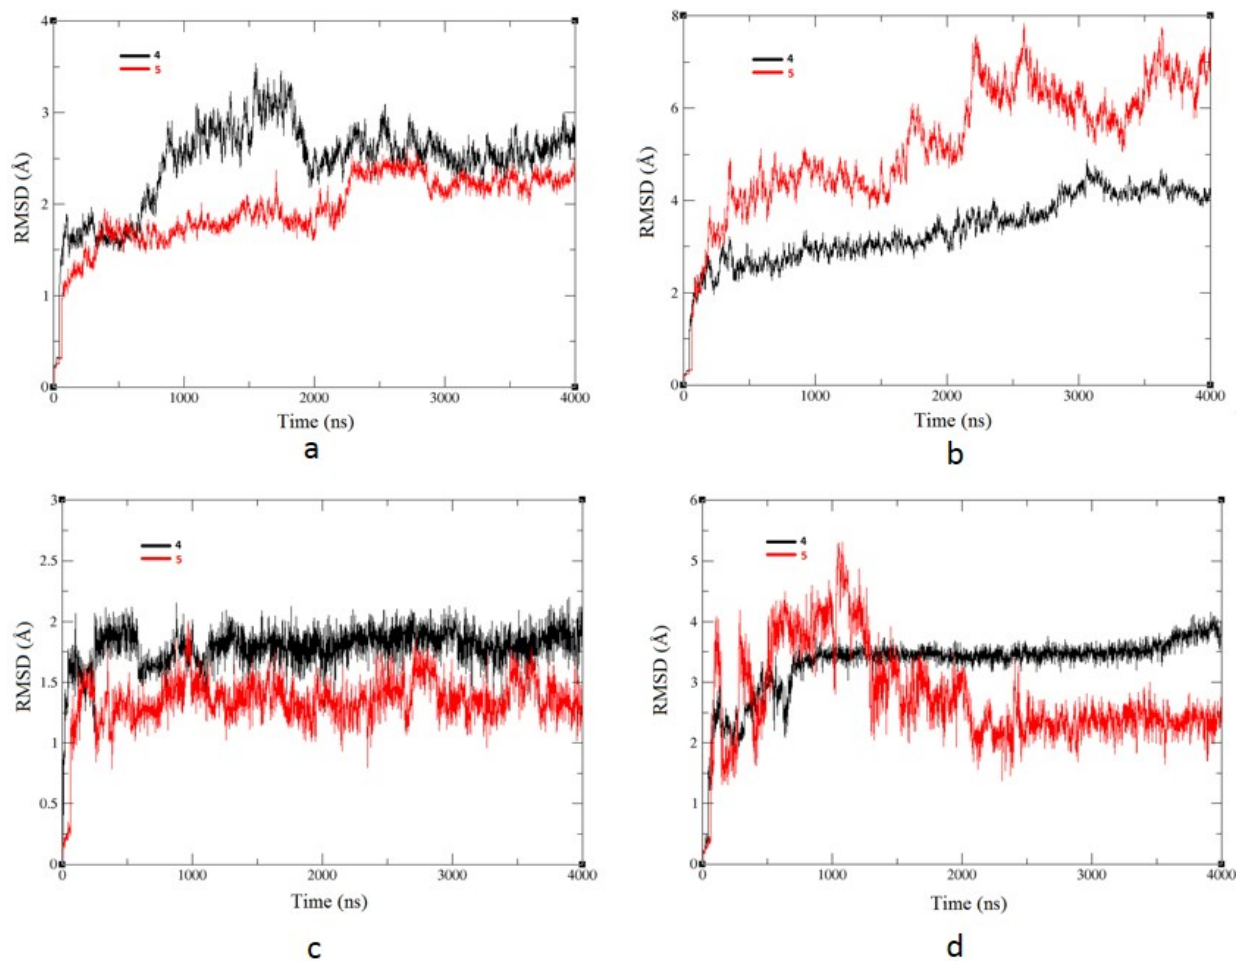

(a) RMSD of backbone atoms of protein in SK1 complexes; (b) RMSDs of backbone atoms of protein in SK2 complexes; (c) RMSDs of ligands in SK1 complexes; (d) RMSDs of ligands in SK2 complexes
